# Supplementary material for: Bst1 is required for Candida albicans infecting host via facilitating cell wall anchorage of Glycosylphosphatidyl inositol anchored proteins
Source: PubMed Central journal article supplement (PMC5052643; doi:10.1038/srep34854), 2016-10-06
Supplement: srep34854-s1.pdf [file srep34854-s1.pdf]

## Supplementary Information

### **Bst1 is required for *Candida albicans* infecting host via facilitating cell wall anchorage of Glycosylphosphatidyl inositol anchored proteins**

**Wei Liu<sup>1†</sup>, Zui Zou<sup>2†</sup>, Xin Huang<sup>3</sup>, Hui Shen<sup>4</sup>, Li Juan He<sup>5</sup>, Si Min Chen<sup>1</sup>, Li Ping Li<sup>1</sup>, Lan Yan<sup>5</sup>, Shi Qun Zhang<sup>1</sup>, Jun Dong Zhang<sup>1</sup>, Zheng Xu<sup>5</sup>, Guo Tong Xu<sup>1</sup>, Mao Mao An<sup>1\*</sup>, Yuan Ying Jiang<sup>1,5\*</sup>**

<sup>1</sup> Shanghai Tenth People's Hospital, and Department of Pharmacology, Tongji University School of Medicine, Shanghai, 200092, P.R. China

<sup>2</sup> Department of Anesthesiology, Changzheng Hospital, Second Military Medical University, Shanghai, 200433, P.R. China

<sup>3</sup> Department of dermatology, Shanghai Tongji Hospital, Tongji University School of Medicine, Shanghai, 200065, P.R. China

<sup>4</sup> Department of Laboratory Diagnosis, Changhai Hospital, Second Military Medical University, 168 Changhai Road, Shanghai 200433, P.R. China

<sup>5</sup> Research and Development Center of New Drug, School of Pharmacy, Second Military Medical University, Shanghai, 200092, P.R. China

\* Corresponding author: [jiangyy@tongji.edu.cn](mailto:jiangyy@tongji.edu.cn) (YYJ); [anmaomao@tongji.edu.cn](mailto:anmaomao@tongji.edu.cn) (MMA)

† These authors contributed equally to this work.

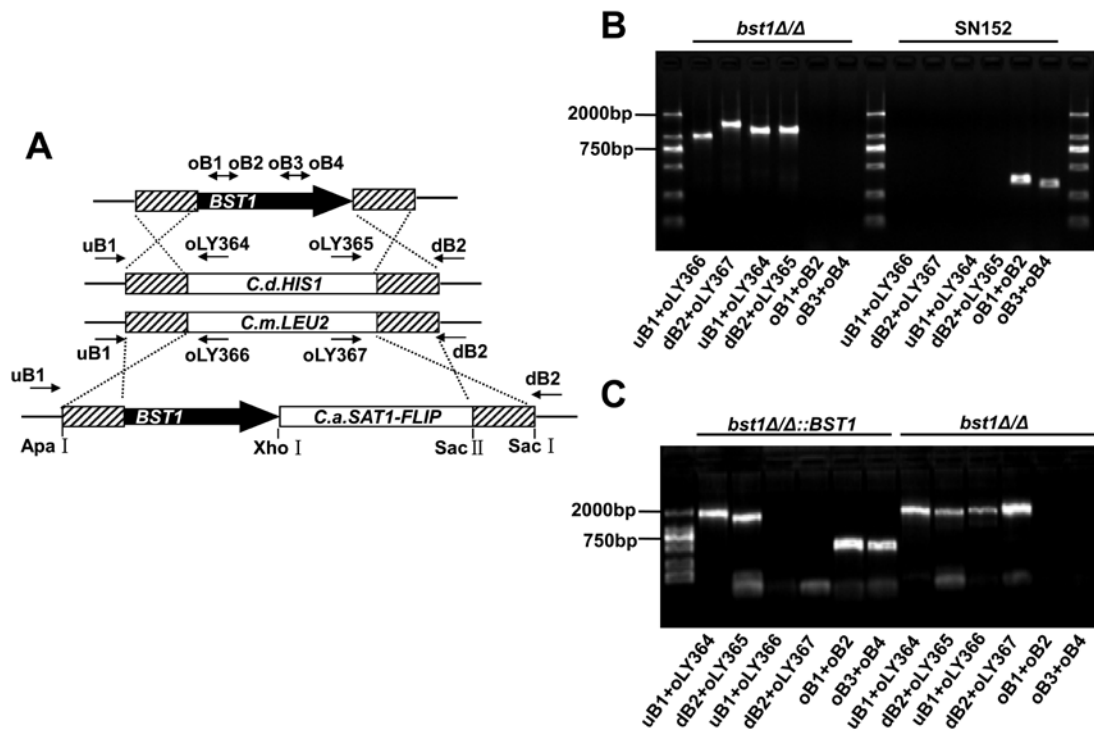

**Supplementary Figure S1. Construction of *bst1* null mutant and the complemented strain.**

(A) Two-step homologous recombination by a fusion-PCR-based strategy for *BST1* gene deletion and SAT1 flipping method for *BST1*-complemented strain construction from parent strain SN152. Arrows represent orientation and approximate position of primers used for PCR (Supplementary Table S2). (B, C) The genotype of *C. albicans* strains were confirmed by PCR. The genomic DNA of SN152, *bst1Δ/Δ* mutant and *BST1*-complemented strains were amplified with the indicated primers.

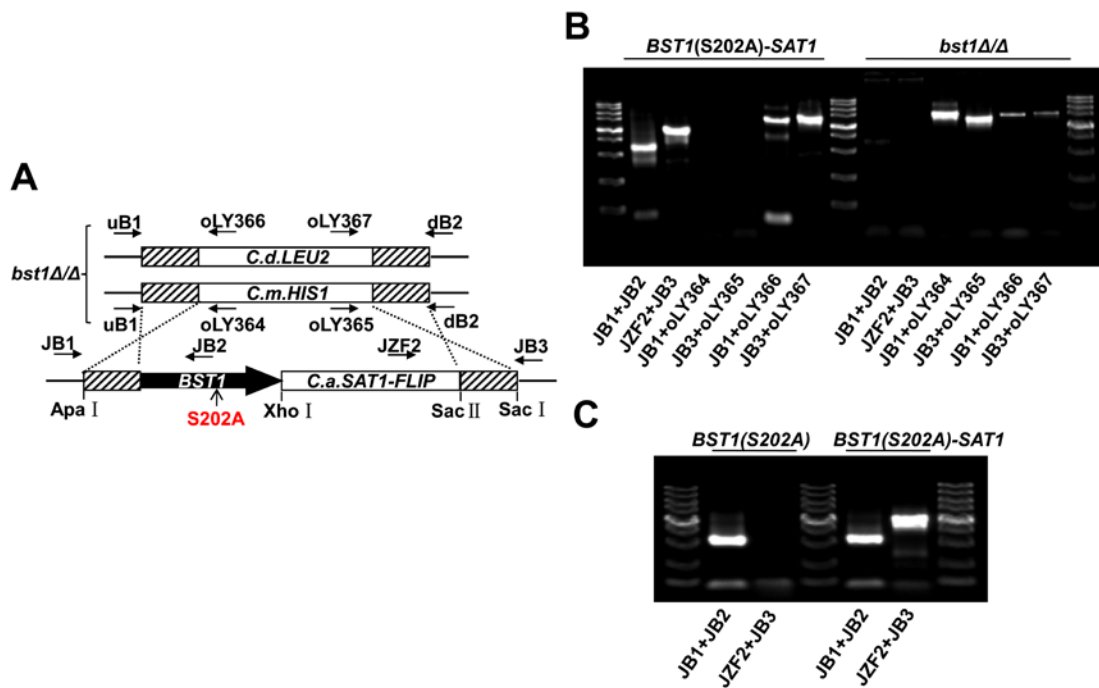

**Supplementary Figure S2. Construction of *BST1* (S202A) mutant strain.**

(A) SAT1 flipping method to substitute serine 202 of *BST1* gene by alanine in *bst1Δ/Δ* mutant strain. (B, C) The genotype of *C. albicans* strains were confirmed by PCR. The genomic DNA of *BST1* (S202A)-SAT1, *bst1Δ/Δ*, and *BST1* (S202A) mutant strains were amplified with the indicated primers.

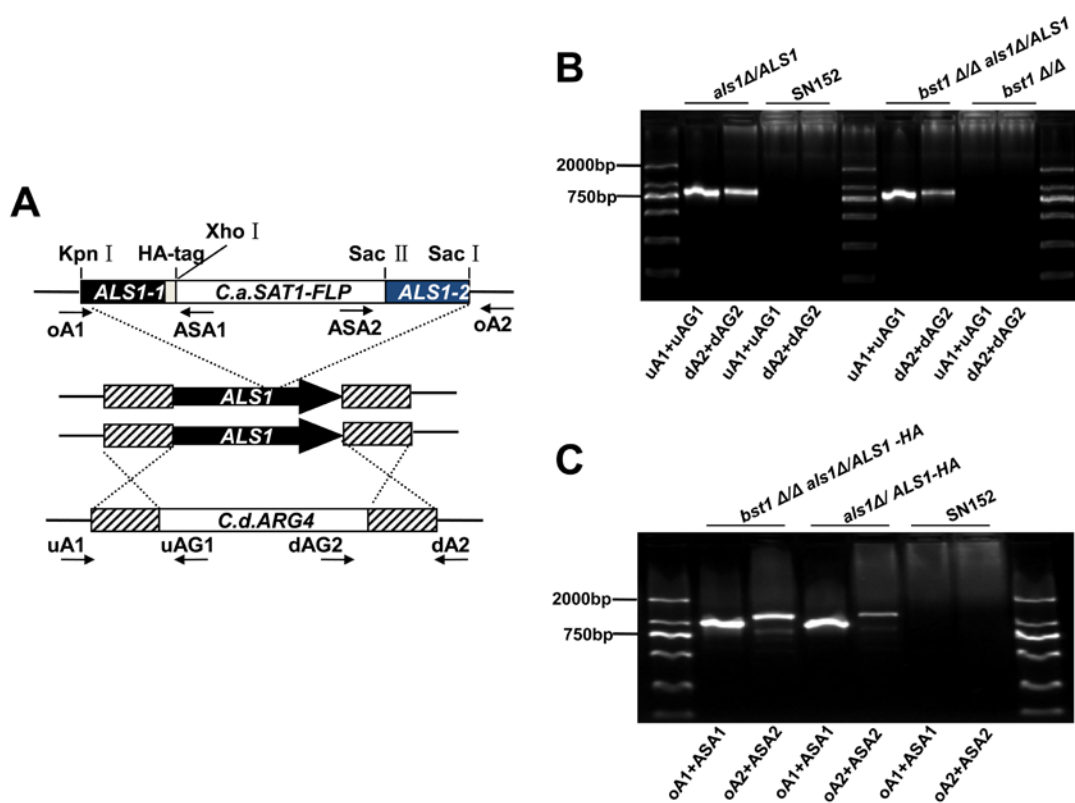

**Supplementary Figure S3. Construction of *C. albicans* strains expressing hemagglutinin (HA)-tag fused Als1p.**

(A) Homologous recombination by a fusion-PCR-based strategy for one allele of *ALS1* deletion and SAT1 flipping method for inserting HA-tag to another allele of *ALS1* gene in *bst1Δ/Δ* mutant and parent strain SN152. (B, C) The genotype of *C. albicans* strains were confirmed by PCR. The genomic DNA of *als1Δ/ALS1*, SN152, *bst1Δ/Δ als1Δ/ALS1*, *bst1Δ/Δ*, *bst1Δ/Δ als1Δ/ALS1-HA* and *als1Δ/ALS1-HA* strains were amplified with the indicated primers.

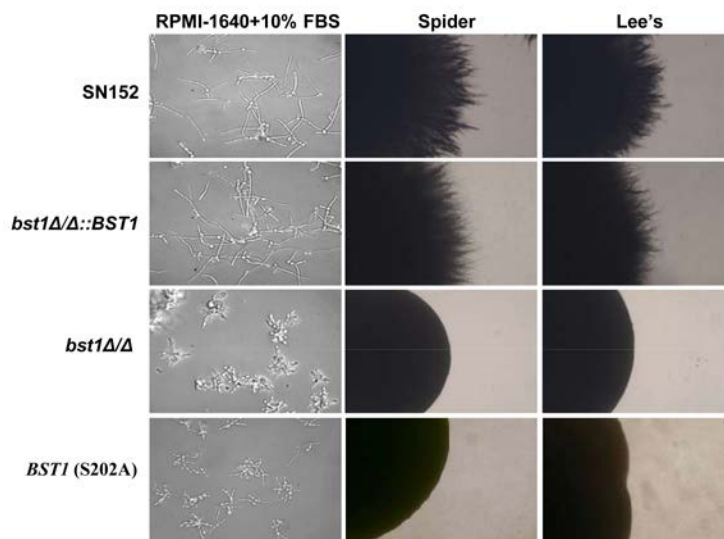

**Supplementary Figure S4. Filamentation of *bst1* mutants was defective in different media favoring hyphal growth.**

Exponentially growing *C. albicans* parent (SN152), *BST1*-complemented (*bst1Δ/Δ::BST1*), *bst1* null mutant (*bst1Δ/Δ*), and *BST1* S202A mutant yeast cells were incubated in RPMI 1640 medium with 10% fetal bovine serum for 3 hours, or grew on spider and lee's agar media for 5 days at 37°C. Representative photographs were shown.

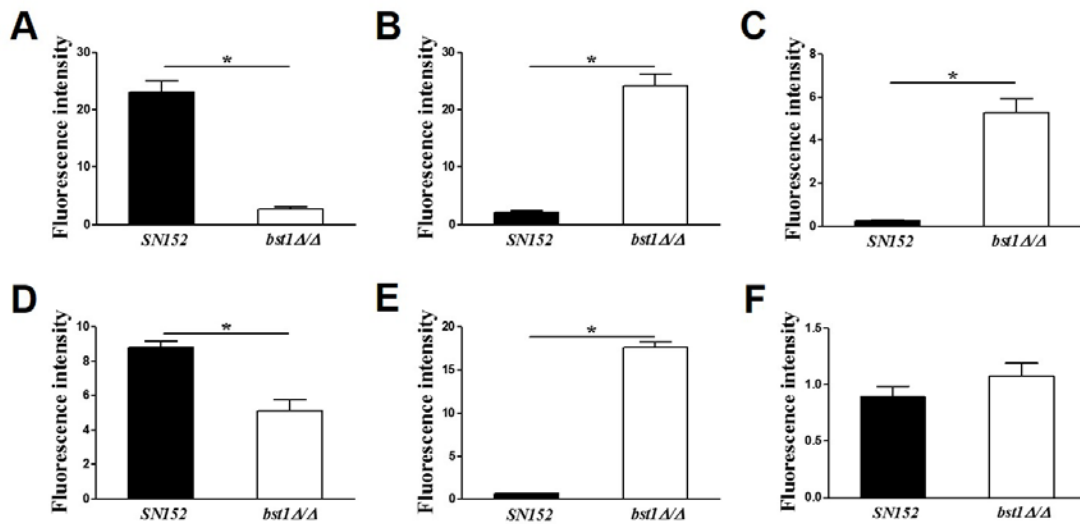

**Supplementary Figure S5. Fluorescence intensity analysis of data shown in Figure 4B-G by the LAS AF Lite program (version 2.1.1, build 4443; Leica Microsystems).**

(A-C). Fluorescence intensity of three cell wall carbohydrate layers from exponentially growing parent (SN152), *BST1*-complemented (*bst1Δ/Δ::BST1*), *bst1Δ/Δ* null mutant (*bst1Δ/Δ*), and *BST1* S202A strains, which were stained with ConA-FITC to visualize mannan (A),  $\beta$ -glucan antibody to visualize  $\beta$ -glucan (B) and CFW to visualize chitin (C).

(D-F). Fluorescence intensity of three cell wall carbohydrate layers from the hyphal forms of parent (SN152), *BST1*-complemented (*bst1Δ/Δ::BST1*), *bst1Δ/Δ* null mutant (*bst1Δ/Δ*), and *BST1* S202A mutant strains, which were stained with ConA-FITC to visualize mannan (D),  $\beta$ -glucan antibody to visualize  $\beta$ -glucan (E) and CFW to visualize chitin (F).

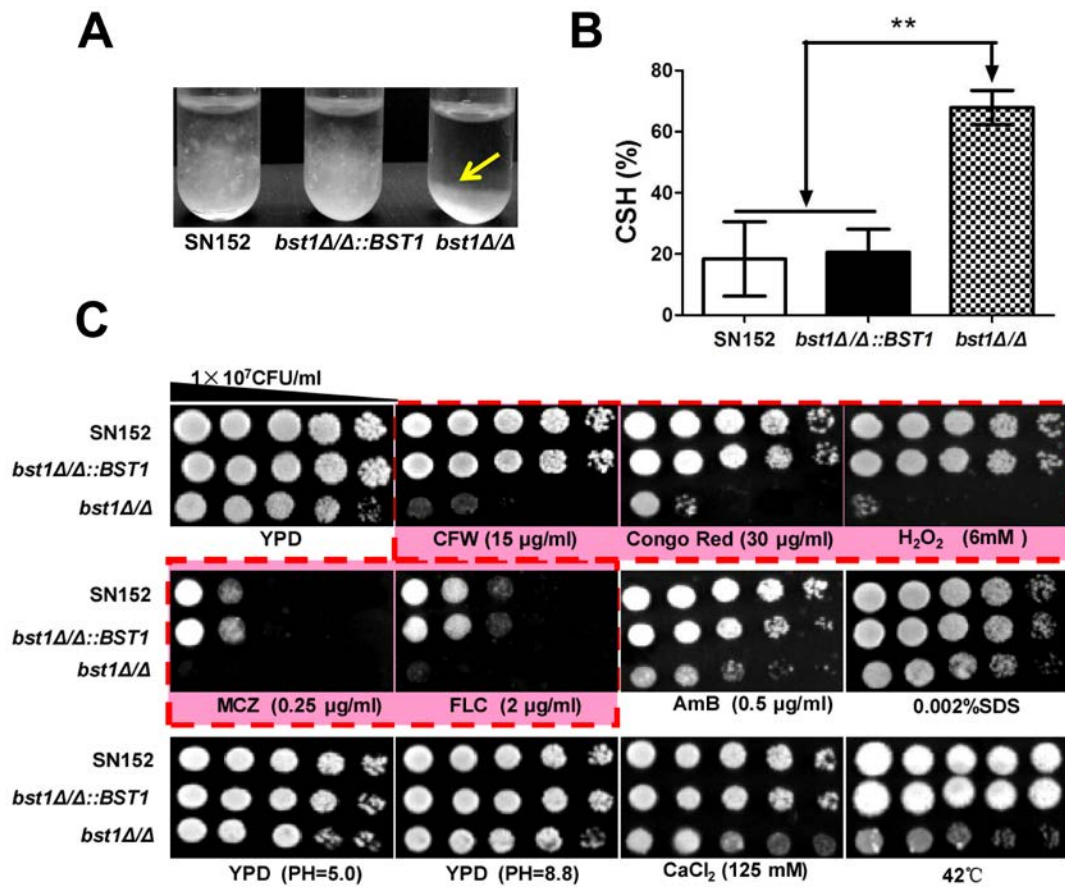

**Supplementary Figure S6. Cell surface properties of *C. albicans* strains and their resistance to stress.**

(A) Flocculation of parent (SN152), *BST1*-complemented (*bst1Δ/Δ::BST1*), *bst1* null mutant (*bst1Δ/Δ*) strains in RPMI 1640 medium for 10 minutes. Representative photographs were shown. (B) Cell surface hydrophobicity (CSH) of SN152, *bst1Δ/Δ::BST1*, and *bst1Δ/Δ* strains. The CSH was measured by the percentage of cells in the hydrophobic phase. \*\*, P<0.01 (Error bars indicate SD. One-way ANOVA with Bonferroni post-test). (C) Resistance of SN152, *bst1Δ/Δ::BST1*, and *bst1Δ/Δ* strains to various indicated stresses. Serial 5-fold dilutions of the *C. albicans* strains were inoculated on YPD plates supplemented with different stresses.

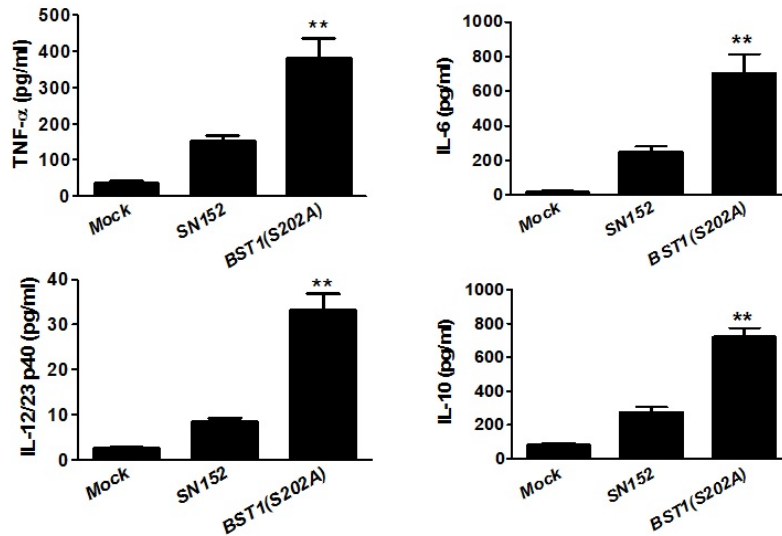

**Supplementary Figure S7. Inflammatory responses in macrophage stimulated by *C. albicans* *BST1* (S202A) mutant.**

Thioglycollate-elicited peritoneal macrophages were stimulated with parent strain SN152, *BST1* (S202A) mutant (MOI=5) for 6 hours. TNF- $\alpha$ , IL-6, IL-12p40 and IL-10 in supernatants of thioglycollate-elicited peritoneal macrophages were measured by ELISA. Mock, unstimulated macrophages. Data represent mean ( $\pm$ SD) of triplicates of one representative experiment of three. \*\*,  $P < 0.01$  (Two-way ANOVA with Bonferroni post-test).



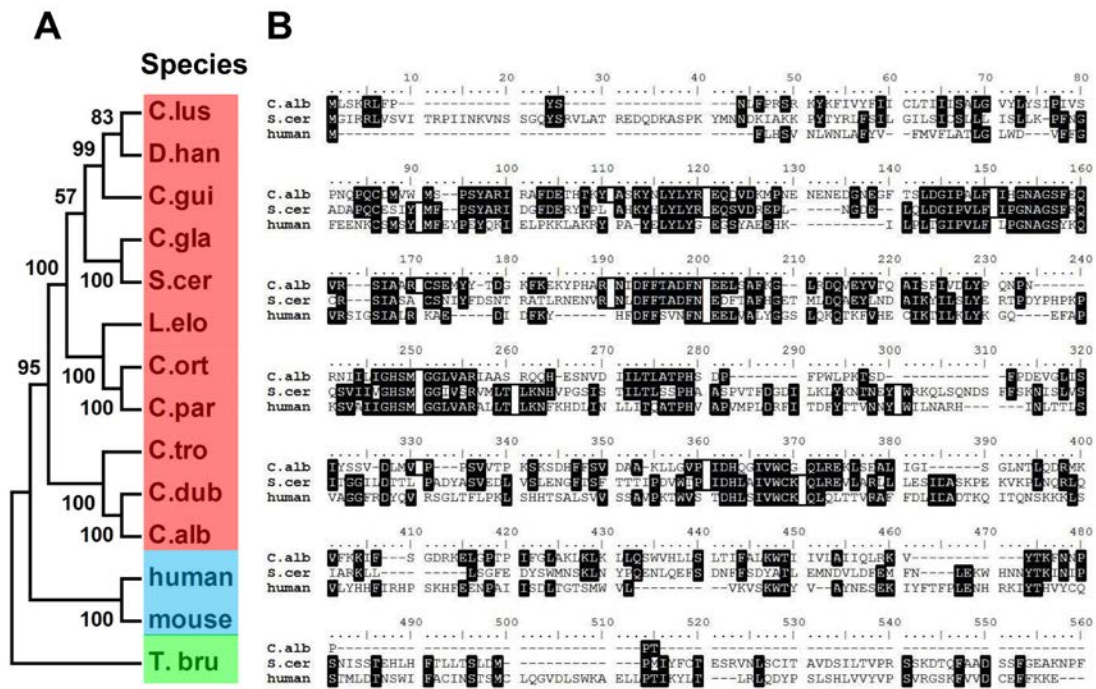

**Supplementary Figure S8. The molecular phylogeny and alignment of inositol deacylase in different species.**

(A) Fourteen homologous inositol deacylase in different species are displayed according to the phylogenetic tree representation. The conserved domains of sequences was analyzed by the MEGA4 program. (B) Multi-protein sequence alignment highlighting the protein differences between *C. albicans* and mammalian cells.

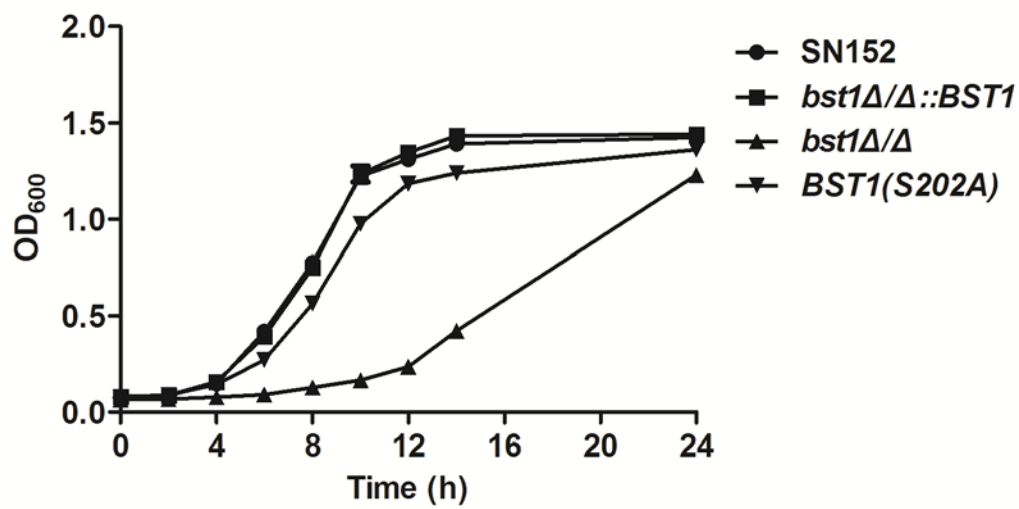

Supplementary Figure S9. Growth curves of *bst1* null mutant (*bst1*Δ/Δ) and *BST1* S202A mutant strains.

**Supplementary Table S1. *C. albicans* strains and plasmids used in this study**

| Strain                                  | Relevant genotype                                                                                                                                   | reference          |
|-----------------------------------------|-----------------------------------------------------------------------------------------------------------------------------------------------------|--------------------|
| <b><i>C. albicans</i></b>               |                                                                                                                                                     |                    |
| SN152                                   | <i>arg4Δ /arg4Δ leu2Δ/leu2Δ his1Δ/his1Δ</i><br><i>URA3/ura3Δ::imm<sup>434</sup> IRO1/iro1Δ ::imm<sup>434</sup></i>                                  | Noble et al., 2005 |
| <i>bst1Δ /Δ</i>                         | <i>bst1Δ::HIS1/ bst1 Δ::LEU2 arg4 Δ /arg4Δ</i><br><i>URA3/ura3Δ::imm<sup>434</sup> IRO1/iro1Δ ::imm<sup>434</sup></i>                               | This study         |
| <i>bst1Δ/Δ::BST1</i>                    | <i>bst1Δ::HIS1/ bst1 Δ::BST1::SAT1-FLIP arg4Δ</i><br><i>/arg4Δ URA3/ura3Δ::imm<sup>434</sup> IRO1/iro1Δ ::imm<sup>434</sup></i>                     | This study         |
| <i>als1Δ/ALS1</i>                       | <i>als1Δ::ARG4 / ALS1 leu2Δ/leu2Δ his1Δ/his1Δ</i><br><i>URA3/ura3Δ::imm<sup>434</sup> IRO1/iro1Δ ::imm<sup>434</sup></i>                            | This study         |
| <i>bst1Δ /Δ</i><br><i>als1Δ/ALS1-HA</i> | <i>bst1Δ::HIS1/ bst1 Δ::LEU2</i><br><i>ALS1::HA::SAT1-FLIP / als1Δ::ARG4</i><br><i>URA3/ura3Δ::imm<sup>434</sup> IRO1/iro1Δ ::imm<sup>434</sup></i> | This study         |
| <i>BST1 (S202A)</i>                     | <i>bst1Δ::LEU2/ bst1 Δ::BST1(S202A)::SAT1-FLIP</i><br><i>arg4Δ /arg4Δ URA3/ura3Δ::imm<sup>434</sup></i><br><i>IRO1/iro1Δ ::imm<sup>434</sup></i>    | This study         |
| <b>Plasmid</b>                          |                                                                                                                                                     |                    |
| pSN40                                   | <i>C. maltosa LEU2</i>                                                                                                                              | Noble et al., 2005 |
| pSN52                                   | <i>C. dubliniensis HIS1</i>                                                                                                                         | Noble et al., 2005 |
| pSN69                                   | <i>C. dubliniensis ARG4</i>                                                                                                                         | Noble et al., 2005 |
| pSFS2                                   | <i>FRT-MAL2p-CaFLP-ACT1-CaSAT1-FRT</i> into<br>pSF11                                                                                                | Reuss et al., 2004 |

## Supplementary Table S2. Primers used in this study

| Primer          | Sequence                                                          | Application                                                                                                   |
|-----------------|-------------------------------------------------------------------|---------------------------------------------------------------------------------------------------------------|
| oB1             | ATGCCCAACGAGAATGAAAA                                              | <i>BST1</i> specific                                                                                          |
| oB2             | CTTGAAGCCGCAATTCTAGC                                              | <i>BST1</i> specific                                                                                          |
| oB3             | TGGCAACACCACATTCTGAT                                              | <i>BST1</i> specific                                                                                          |
| oB4             | TGGTGTGGACCCAATTCTT                                               | <i>BST1</i> specific                                                                                          |
| uB1             | CCCAATCCACTACTTGTCC                                               | <i>BST1</i> upstream<br>Check                                                                                 |
| dB2             | AAAAACCGCTTCCACTGATG                                              | <i>BST1</i><br>downstream<br>Check                                                                            |
| oLY364          | TCAAGCCCTGTAGCTCCATT                                              | <i>HIS1</i> check                                                                                             |
| oLY365          | TCCGCTCATTTGATTTCTC                                               | <i>HIS1</i> check                                                                                             |
| oLY366          | GCACGCCGTTACAGGAGTTA                                              | <i>LEU2</i> check                                                                                             |
| oLY367          | GAAGTTGGTGACGCGATTGT                                              | <i>LEU2</i> check                                                                                             |
| P2              | ccgctgctaggcgcgccgtgACCAGTGTGATGGATATCTGC<br>(Noble et al., 2005) | <i>LEU2</i> ,<br>and <i>ARG4</i><br>cassettes<br>for <i>HIS1</i> ,                                            |
| P5              | ccagggatgcggccgctgacAGCTCGGATCCACTAGTAACG<br>(Noble et al., 2005) | <i>LEU2</i> ,<br>and <i>ARG4</i><br>cassettes<br>Upstream                                                     |
| <i>BST1</i> P1  | TGTATTTCCCCATGGTGTT                                               | region of <i>BST1</i><br>for disruption                                                                       |
| <i>BST1</i> P3  | cacggcgcgcctagcagcggATGGTTGGGTGGCTTTAGTG                          | Upstream<br>region of <i>BST1</i><br>for disruption                                                           |
| <i>BST1</i> P4  | gtcagcggccgcctcctgcAACCTCCACCCACACACTA                            | Downstream<br>region of <i>BST1</i><br>for disruption                                                         |
| <i>BST1</i> P6  | CCAGGTGAATTGGCTAAACA                                              | Downstream<br>region of <i>BST1</i><br>for disruption                                                         |
| <i>BST1</i> huF | GCC GGGCCC TCCCAGATATTTCTCCTTTTTC                                 | Upstream<br>region of <i>BST1</i><br>with Apa I<br>restriction<br>sequence to<br>reconstituted<br><i>BST1</i> |
| <i>BST1</i> huR | GCC CTCGAG CTAGTGTGTGGGTGGAGGGT                                   | with Xho I                                                                                                    |

---

|                           |                                  |                                                                                                                                                                                                                                                                                                                                                                     |
|---------------------------|----------------------------------|---------------------------------------------------------------------------------------------------------------------------------------------------------------------------------------------------------------------------------------------------------------------------------------------------------------------------------------------------------------------|
|                           |                                  | restriction<br>sequence to<br>reconstituted<br><i>BST1</i><br>Downstream<br>region of <i>BST1</i><br>with Sac II<br>restriction<br>sequence to<br>reconstituted<br><i>BST1</i><br>Downstream<br>region of <i>BST1</i><br>with Sac I                                                                                                                                 |
| <i>BST1</i> hdF           | GCC CCGCGG AACCTCCACCCACACACTA   | restriction<br>sequence to<br>reconstituted<br><i>BST1</i><br>Downstream<br>region of <i>BST1</i><br>with Sac I                                                                                                                                                                                                                                                     |
| <i>BST1</i> hdR           | GCC GAGCTC TTTTGAAACAACTCACCCAGA | restriction<br>sequence to<br>reconstituted<br><i>BST1</i><br><i>BST1</i> upstream<br>Check<br><i>BST1</i><br>downstream<br>Check<br><i>BST1</i> Check<br><i>BST1</i> with<br>S202A mutation<br><i>BST1</i> with<br>S202A mutation<br><i>ALS1</i> upstream<br>Check for one<br>allele disruption<br><i>ALS1</i><br>downstream<br>Check for one<br>allele disruption |
| JB1                       | CCACCAAGGAAAGCTGGTAG             | <i>ARG4</i> check<br><i>ARG4</i> check<br>One region of<br><i>ALS1</i> with Kpn<br>I restriction<br>sequence to add<br>HA-tag into<br><i>ALS1</i><br>One region of                                                                                                                                                                                                  |
| JB3                       | GCTTCCACTGATGGTGCTAA             |                                                                                                                                                                                                                                                                                                                                                                     |
| JB2                       | ATGGTTGGGTGGCTTTAGTG             |                                                                                                                                                                                                                                                                                                                                                                     |
| <i>BST1</i> (S202A)<br>R1 | AGTCCACCCATTGCATGACC             |                                                                                                                                                                                                                                                                                                                                                                     |
| <i>BST1</i> (S202A)<br>F2 | GGTCATGCAATGGGTGGACT             |                                                                                                                                                                                                                                                                                                                                                                     |
| uA1                       | TTGCAAAAATTTCCAACCTGGT           |                                                                                                                                                                                                                                                                                                                                                                     |
| dA2                       | CAACTTGCTTTGCTCTGCAC             |                                                                                                                                                                                                                                                                                                                                                                     |
| <i>ARG4</i> JR            | CTCAATAAAACAATCCTGGGT            |                                                                                                                                                                                                                                                                                                                                                                     |
| <i>ARG4</i> JF            | TTCAAAATAGGTATCACGGGC            |                                                                                                                                                                                                                                                                                                                                                                     |
| <i>ALS1</i> uF            | GCC GGTACC AGCACAACCTCCGATTGTC   |                                                                                                                                                                                                                                                                                                                                                                     |
| <i>ALS1</i> uR            | TTGGTTGTCTCCATTGCTTG             |                                                                                                                                                                                                                                                                                                                                                                     |

---

---

|                  |                                              |                                                                                                          |
|------------------|----------------------------------------------|----------------------------------------------------------------------------------------------------------|
|                  |                                              | <i>ALS1</i> to add<br>HA-tag into<br><i>ALS1</i>                                                         |
| <i>ALS1</i> HA F | CAAGCAATGGAGACAACCAA atcttttacccatagatgttcct | One region of<br>HA tag add<br>HA-tag into<br><i>ALS1</i>                                                |
| <i>ALS1</i> HA R | GCC CTCGAG ctgagcagcgtaatctggaa              | One region of<br>HA tag with<br>Xho I<br>restriction<br>sequence to add<br>HA-tag into<br><i>ALS1</i>    |
| <i>ALS1</i> dF   | GCC CCGCGG AGTGGTACTCATGATTCACAATCT          | One region of<br><i>ALS1</i> with Sac<br>II restriction<br>sequence to add<br>HA-tag into<br><i>ALS1</i> |
| <i>ALS1</i> dR   | GCC GAGCTC TGGAGATTTACCACCATTTTCA            | One region of<br><i>ALS1</i> with Sac I<br>restriction<br>sequence to add<br>HA-tag into<br><i>ALS1</i>  |
| oA1              | ATTTGCCACAACCACCACAG                         | Check for<br>HA-tagged<br><i>ALS1</i>                                                                    |
| oA2              | TCATTTGAAGCACTGGCAAC                         | Check for<br>HA-tagged<br><i>ALS1</i>                                                                    |
| JZR1             | GCACGCTAGACAAATTCTTCC                        | Check for<br>HA-tagged<br><i>ALS1</i>                                                                    |
| JZF2             | CAGCTCCTTGGCATAACGATT                        | Check for<br>HA-tagged<br><i>ALS1</i>                                                                    |

---

**Supplementary Table S3. Twenty one GPI-APs with significantly impaired cell wall anchorage in *BST1*-deficient *C. albicans* strains**

| Proteins   | Function                                                                                      | Relative fold change<br>( <i>bst1Δ/Δ</i> versus parent strain ) |
|------------|-----------------------------------------------------------------------------------------------|-----------------------------------------------------------------|
| Pga4       | 1,3-beta-glucanosyltransferase                                                                | 0.012                                                           |
| Cht2       | Hydrolysis of N-acetyl-beta-D-glucosaminide (1->4)-beta-linkages in chitin and chitodextrins. | 0.009                                                           |
| Utr2       | Extracellular glycosidase                                                                     | 0.036                                                           |
| Dfg5       | Endo-1,6-alpha-D-mannosidase                                                                  | 0.078                                                           |
| Ecm33      | Cell wall integrity and for the correct assembly of the mannoprotein                          | 0.014                                                           |
| Dcw1       | Endo-1,6-alpha-D-mannosidase                                                                  | 0                                                               |
| Ccw14      | Cell wall structure                                                                           | 0.009                                                           |
| Ihd1       | Cell wall organization, hyphal growth                                                         | 0                                                               |
| Crh11      | Extracellular glycosidase.                                                                    | 0.038                                                           |
| Als1       | Mediates both yeast-to-host tissue adherence and yeast aggregation                            | 0.013                                                           |
| Pga24/Ywp1 | Anti-adhesive and promotes dispersal of yeast forms                                           | 0.283                                                           |
| Pga29/Rhd3 | Hyphae development                                                                            | 0.049                                                           |
| Sod4       | Cell surface superoxide dismutase [Cu-Zn] 4                                                   | 0                                                               |
| Sod5       | Cell surface superoxide dismutase [Cu-Zn] 5                                                   | 0.047                                                           |
| Plb5       | Phospholipase activity                                                                        | 0.147                                                           |
| Carp9      | Secreted aspartic peptidases                                                                  | 0                                                               |
| Csa        | Heme-binding                                                                                  | 0.024                                                           |
| Rbt5       | Heme-iron utilization                                                                         | 0.005                                                           |
| Pga52      | Unknown                                                                                       | 0.123                                                           |
| Pga30      | Unknown                                                                                       | 0.015                                                           |
| Pga45      | Unknown                                                                                       | 0                                                               |
| Kre9**     | Beta-1,6-glucan biosynthesis                                                                  | 0.740                                                           |

Kre9\*, a cell wall non-GPI anchored protein was shown as a control.

## Supplemental Experimental Procedures

### Strain construction

The *C. albicans* strains and plasmids used in these studies and their relevant genotypes are listed in Supplementary Table S1. All strains were maintained on SDA agar (1% peptone, 4% dextrose, and 1.8% agar) plates and re-cultured at least monthly from -80°C stock. For use in the experiments, yeast-phase cells of the various strains were grown in YPD broth overnight in a rotary shaker at 30°C.

Construction of *CaBST1*-deleted and complemented strains (Supplementary Fig. S1). *CaBST1* gene was knocked out in the parental strain SN152 by using a two-step homologous recombination approach based on a fusion-PCR-based strategy<sup>1</sup> (Supplementary Fig. S1). Plasmid pSN52 and pSN40 were used as templates to amplify the auxotrophic markers *Candida dubliniensis* HIS1 or *Candida maltosa* LEU2 by PCR with primer P2 and P5. 3' and 5' flanking homologous sequences were amplified by PCR with primer pairs *BSTIP1-BSTIP3* and *BSTIP4-BST1 P6* (Supplementary Table S2), using strain SN152 genomic DNA as templates. The knockout cassettes (*bst1Δ::C.d.HIS1* and *bst1Δ::C.m.LEU2*) containing auxotrophic markers and homologous sequences were generated by fusion-PCR with primers *BSTIP1* and *BSTIP6* (Table S2). PCR products were used to transform parent strain SN152 using yeast transformation II kit (Clontech) following the manufacturer's protocol and selected on synthetic defined (SD) medium (2% glucose, 0.67% yeast nitrogen base and 0.2% amino acid mix) lacking histidine for the first allele deletion



of the *CaBST1*, and lacking both histidine and leucine for the second allele deletion of the *CaBST1*. To construct the *BST1*-complemented strain (*bst1Δ/Δ::BST1*), *ApaI*-*XhoI* fragment containing 5' homologous sequence and the entire *BST1* coding sequence, and *SacII*-*SacI* fragment containing 3' homologous fragment were cloned into the plasmid pSFS2A, respectively<sup>2</sup>. The resulting plasmid, containing SAT1-flipper cassette was linearized by digestion with *SacI* and transformed into *bst1Δ/Δ* using yeast transformation II kit (Clotech), as described by the manufacturer, and selected on YPD agar (1% yeast extract, 2% peptone, 2% dextrose, and 1.8% agar) plates with 200 μg/ml nourseothricin. The genotype of *bst1* null mutant (*bst1Δ/Δ*) and *BST1*-complemented strains were confirmed by PCR with primers uB1-oLY366, uB1-oLY364, dB2-oLY365, dB2-oLY367, oB1-oB2 and oB3-oB4 listed in Table S2 (Supplementary Fig. S1B and C).

*BST1* S202A mutant was constructed in *bst1Δ/Δ* mutant strain (Supplementary Fig. S2A). *ApaI*-*XhoI* fragment containing 5' homologous sequences and the *BST1* coding sequence with the putative catalytic serine 202 substituted by alanine, and *SacII*-*SacI* fragment containing 3' homologous fragment were cloned into the plasmid pSFS2A, respectively<sup>2</sup>. The resulting plasmid, containing SAT1-flipper cassette was linearized by digestion with *SacI* and transformed into *bst1Δ/Δ* using yeast transformation II kit (Clotech) following the manufacturer's protocol and selected on YPD agar plates with 200 μg/ml nourseothricin. The genotype of *BST1*(S202A) mutants were confirmed by PCR with primers JB1-oLY366, JB1-oLY364, JB3-oLY365, JB3-oLY367, JB1- JB2 and JZF2-JB3 listed in Supplementary Table S2 (Supplementary Fig. S2B and C).

Strains expressed hemagglutinin (HA)-tag fused Als1p (*bst1Δ/Δ als1Δ/ALS1*-HA and *als1Δ/ALS1*-HA) were generated in strain *bst1Δ/Δ* and parent strain SN152 (Supplementary Fig. S3A). One allele of *ALS1* was replaced by auxotrophic markers *C. dubliniensis* ARG4 by homologous recombination approach based on a fusion-PCR-based strategy as described above. A 102 bp fragment containing three repeated sequence of hemagglutinin (HA)-tag was inserted into the *ALS1* gene allele by SAT1 flipping method. The resulting plasmid was linearized by digestion with *SacI* and transformed into the above strain *bst1Δ/Δ* and SN152 with one allele of *ALS1* deletion. The genotype of *bst1Δ/Δ als1Δ/ALS1*-HA and *als1Δ/ALS1*-HA strains were confirmed by PCR with primers uA1-uAG1, dA2-dAG2, oA1-ASA1 and oA2-ASA2 listed in Supplementary Table S2 (Supplementary Fig S3B and C).

### **Supplementary Reference List:**

- 1 Noble, S. M. & Johnson, A. D. Strains and strategies for large-scale gene deletion studies of the diploid human fungal pathogen *Candida albicans*. *Eukaryotic cell* **4**, 298-309, doi:10.1128/EC.4.2.298-309.2005 (2005).
- 2 Reuss, O., Vik, A., Kolter, R. & Morschhauser, J. The SAT1 flipper, an optimized tool for gene disruption in *Candida albicans*. *Gene* **341**, 119-127, doi:10.1016/j.gene.2004.06.021 (2004).
